# Supplementary material for: Mitochondrial super complexes in the colorless chlorophycean alga Polytomella parva
Source: Research Square preprint supplement (doi:10.21203/rs.3.rs-7871941/v1), 2025-10-31
Supplement: Supplementary file 1 [file a75896a06576cc151d6ba263.docx]

***Supplementary Material***

**
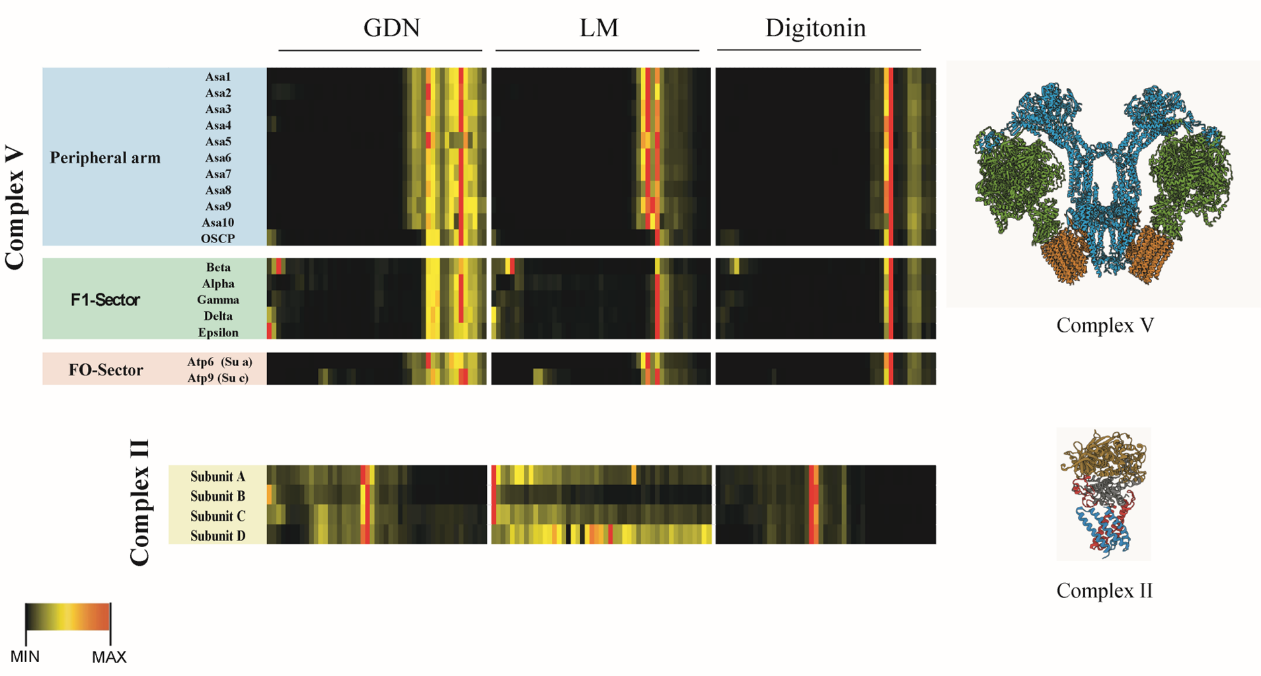
**

**Figure S1. Comparison between the complexome profile of mitochondria isolated from *P. parva* with three different detergents.**

Mitochondria isolated from *P. parva* were solubilized with detergents at a ratio of 2:1 mg of detergent per mg of protein. The samples were separated by BN-PAGE followed by quantitative mass spectrometry analysis. The amount (iBAQ) of each of the subunits that form the different complexes was represented by a heat map. For complexes V and II, all its known constituent subunits were identified, 18 and 4, respectively.


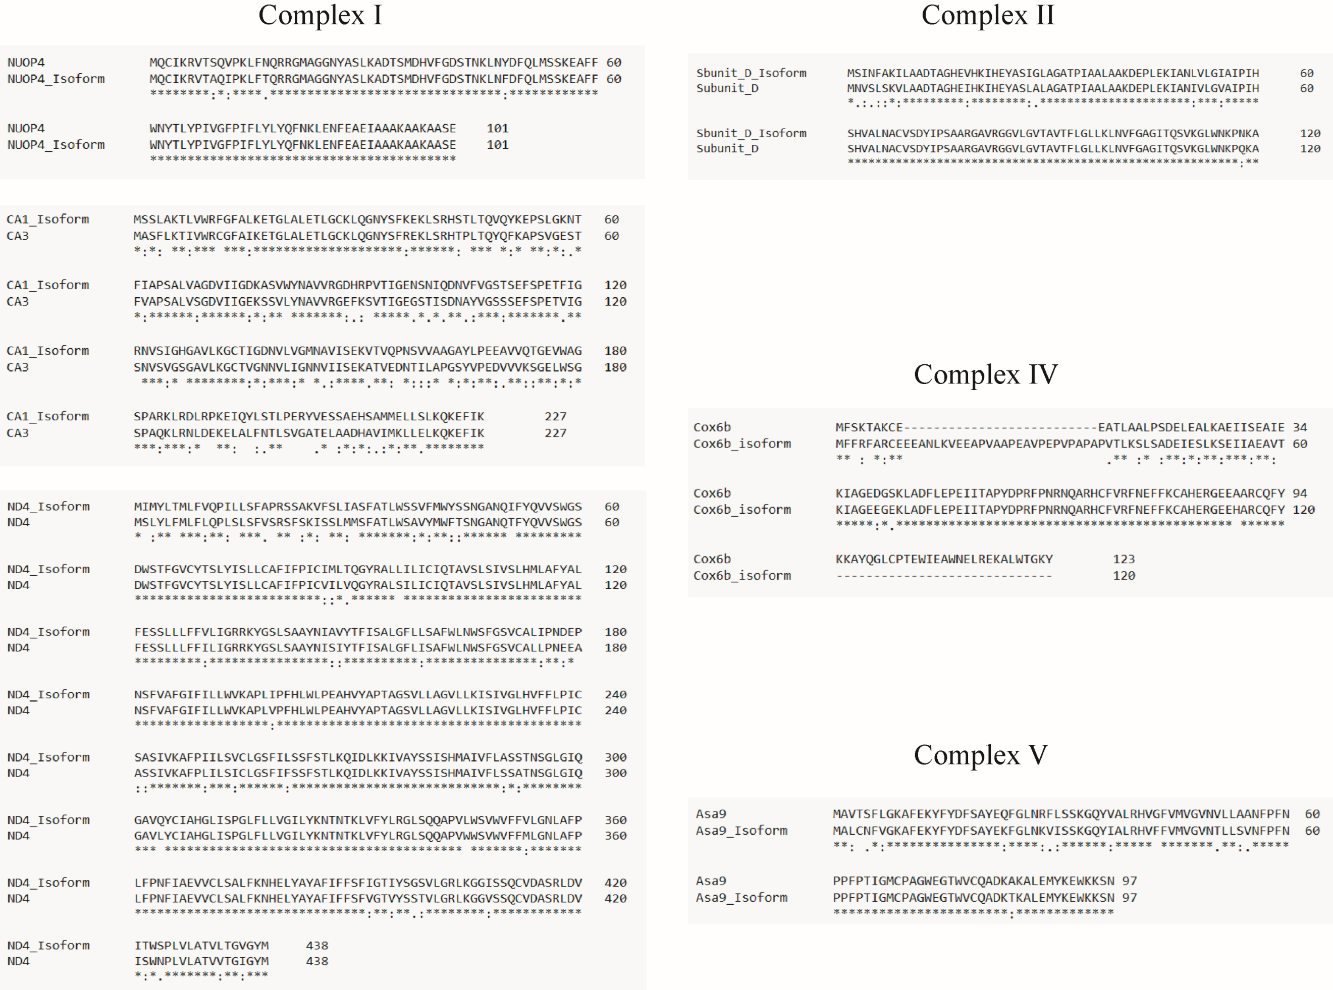


**Figure S2. Isoforms of some subunits of the OXPHOS complexes.** Sequence alignment of the isoforms found in complex I (NUPO4, ND4 and CA3), complex II (subunit D), complex IV (Cox6b), and complex V (Asa9).

**
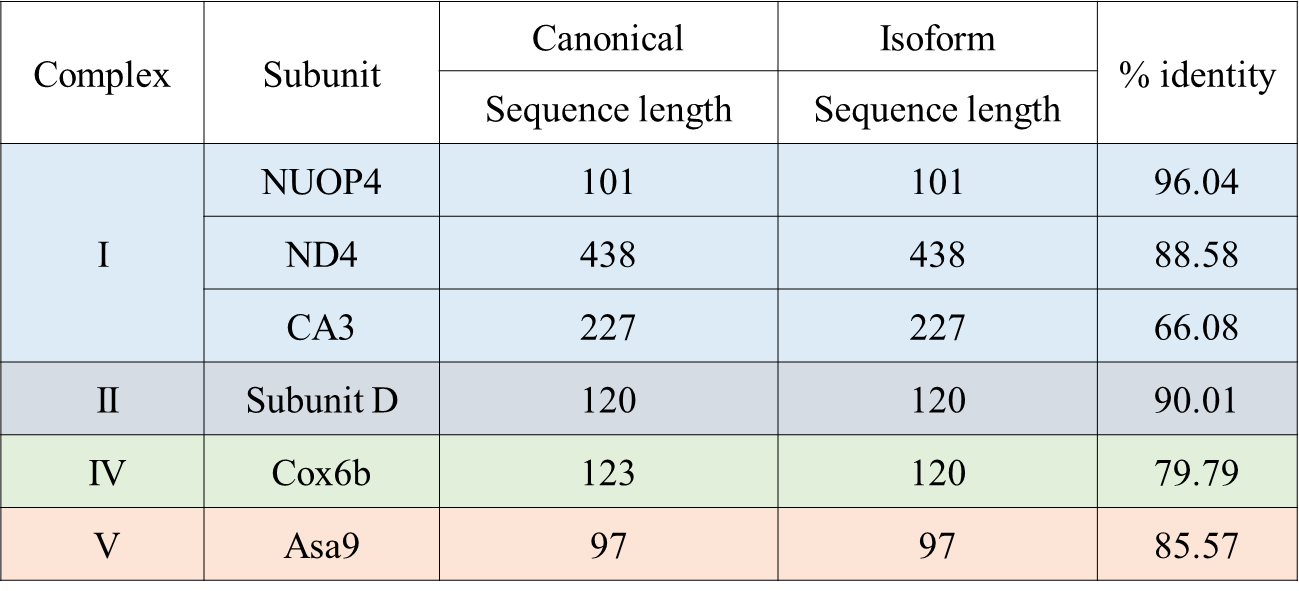
**

**Table S1. Subunit isoforms present in the algal OXPHOS complexes.** Analysis of the clusters where the subunits belonging to the OXPHOS complexes were found allowed us to identify the presence of six subunits with small variations in amino acid composition that are also present in the mature complexes.


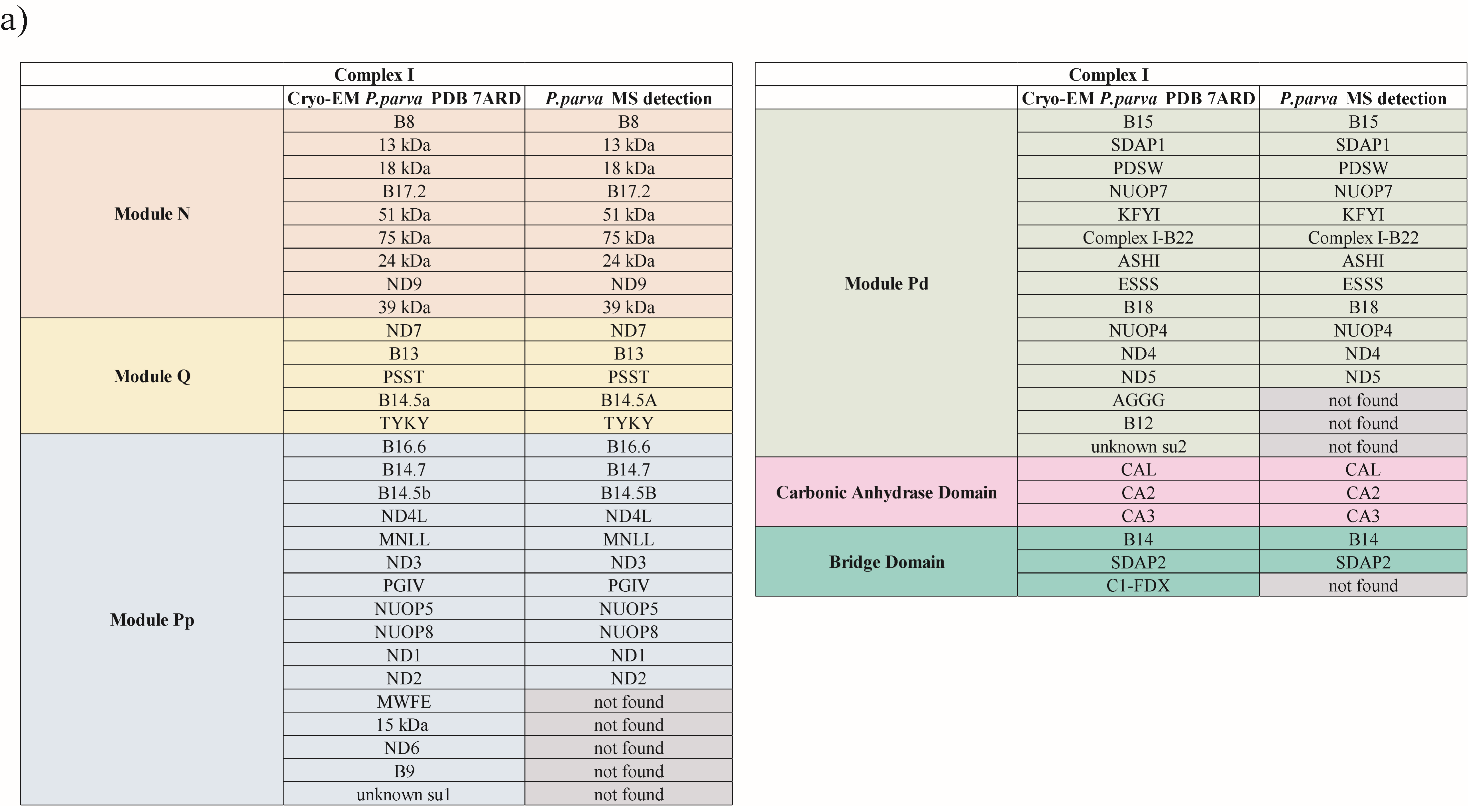


**Table S2.** **Subunits of mitochondrial complexes I, III, and IV identified by MS.** Comparison of subunits belonging to the green alga *C. reinhardtii* complexes, with its corresponding counterparts in the colorless *P. parva* complexes. a) complex I.


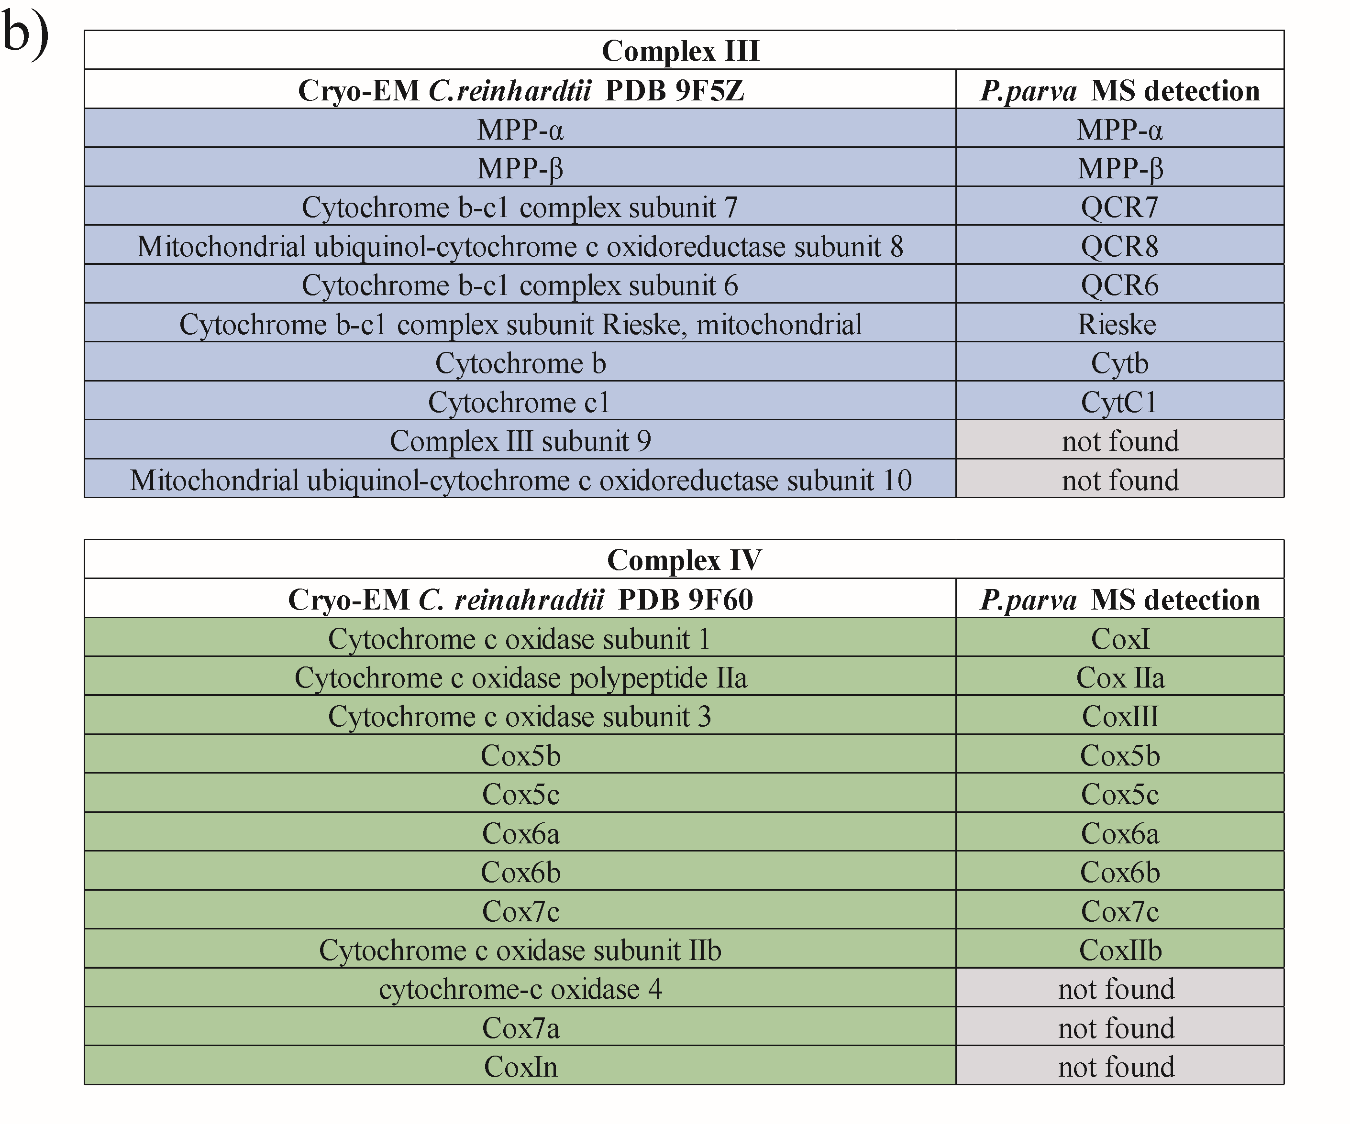


**Table S2 (continued).** **Subunits of mitochondrial complexes I, III, and IV identified by MS.** Comparison of subunits belonging to the green alga *C. reinhardtii* complexes, with its corresponding counterparts in the colorless *P. parva* complexes. b) complexes III, and IV.

**
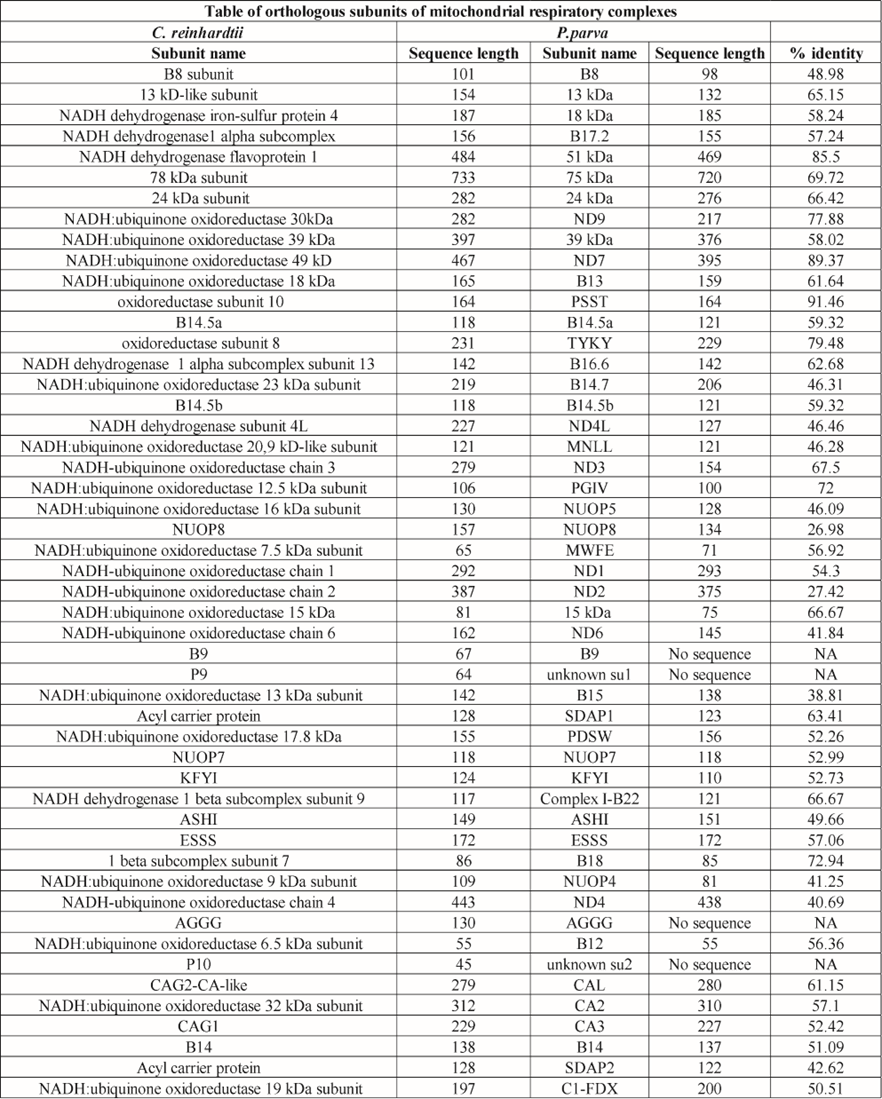
**

**Table S3 (continued). List of subunits of complexes I, III, and IV from *C. reinhardtii* and their putative orthologs in *P. parva.*** The name, length of the amino acid chain and the percentage identity for each sequence is listed.

**
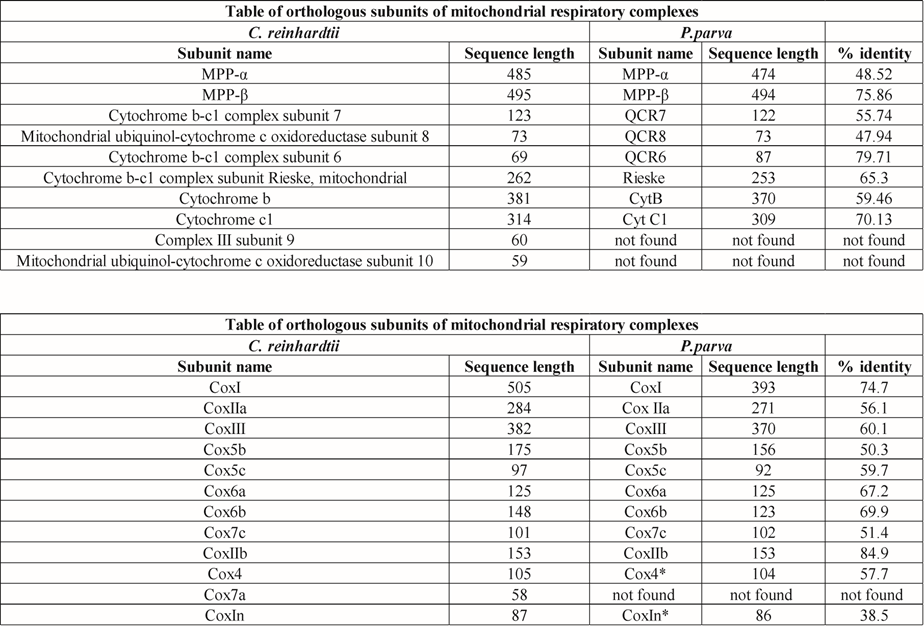
**

**Table S3 (continued). List of subunits of complexes I, III, and IV from *C. reinhardtii* and their putative orthologs in *P. parva.*** The name, length of the amino acid chain and the percentage identity for each sequence is listed.
